# Supplementary material for: Cold case: The disappearance of Egypt bee virus, a fourth distinct master strain of deformed wing virus linked to honeybee mortality in 1970’s Egypt
Source: PubMed Central journal article supplement (PMC8760790; doi:10.1186/s12985-022-01740-2), 2022-01-15
Supplement: 12985_2022_1740_MOESM1_ESM.pdf [file 12985_2022_1740_MOESM1_ESM.pdf]

## **Supplementary files**

### **Cold case: The disappearance of Egypt bee virus, a fourth distinct master strain of deformed wing virus linked to honeybee mortality in 1970's Egypt**

Joachim R. de Miranda, Laura E. Brettell, Nor Chejanovsky, Anna K. Childers, Anne Dalmon, Ward Deboutte, Dirk C de Graaf, Vincent Doublet, Haftom Gebremedhn, Elke Genersch, Sebastian Gisder, Fredrik Granberg, Nizar J. Haddad, Rene Kaden, Robyn Manley, Jelle Matthijssens, Ivan Meeus, Hussein Migdadi, Meghan O. Milbrath, Fanny Mondet, Emily J. Remnant, John M. K. Roberts, Eugene V. Ryabov, Noa Sela, Guy Smagghe, Hema Somanathan, Lena Wilfert, Owen N. Wright, Stephen J. Martin, Brenda V. Ball

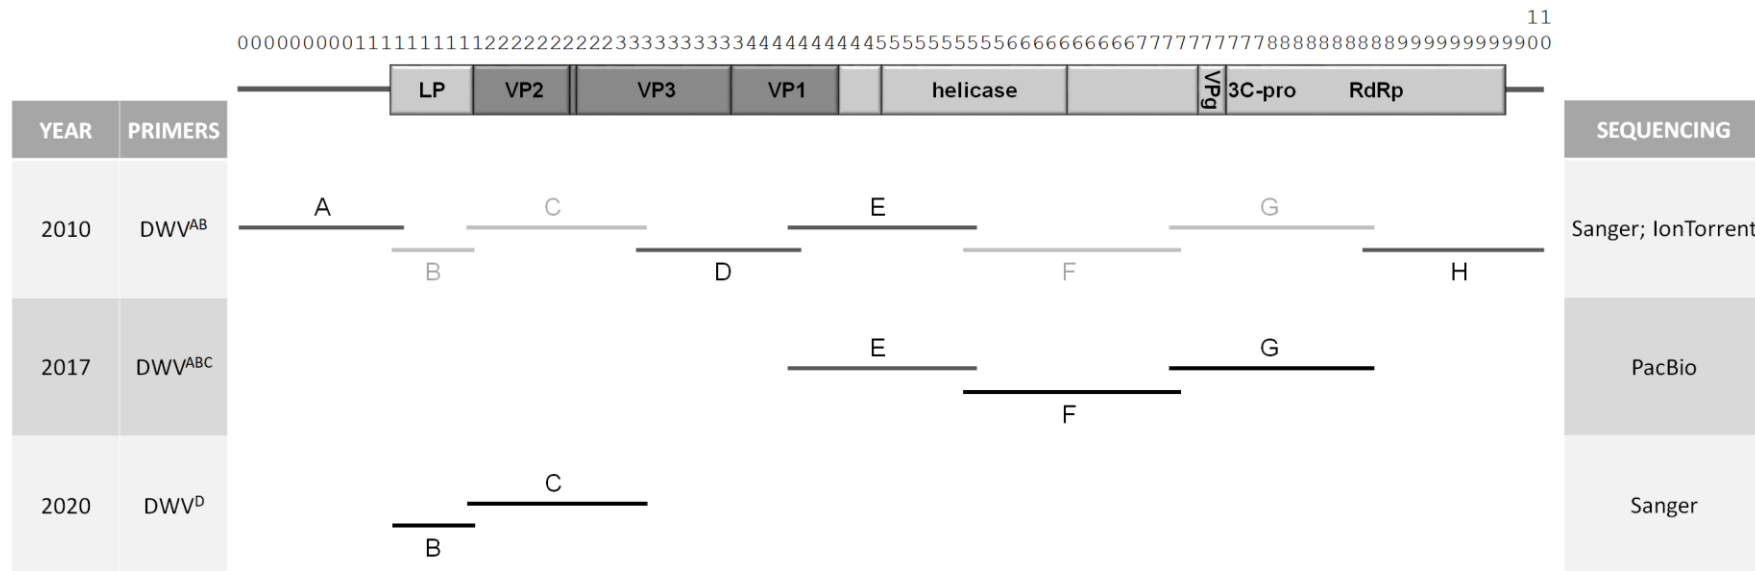

### Supplementary Figure S1: Amplification and sequencing strategy

Amplification and sequencing strategy for determining the full DWV-D/EBV genome sequence. A genome map of DWV-D, indicating all the major structural and non-structural proteins, is shown together with a ruler in 100 nt intervals. Mapped onto this genome are the eight RT-PCR fragments (A-H) amplified with different sets of primers consensual for DWV-A, DWV-B and/or DWV-C, or specific for DWV-D. Also shown is the year the amplicons were produced and sequenced, as well as the primary sequencing technology used. Fragments in black were amplified successfully on the various occasions, while those in grey could not be amplified with the corresponding primers (Supplementary Table S1).



| Fragment | Primers (AB)                | Sequence (5' to 3')      | Size | Primers (ABC)                | Sequence (5' to 3')         | Size | Primers (D)               | Sequence (5' to 3')         | Size |
|----------|-----------------------------|--------------------------|------|------------------------------|-----------------------------|------|---------------------------|-----------------------------|------|
| A        | DWV <sup>(AB)</sup> -F27    | CATAGCGAATTACGGTGC       | 1230 | DWV <sup>(ABC)</sup> -F27    | CATAGCGAAGTACGGTGC          | 1226 |                           |                             |      |
|          | DWV <sup>(AB)</sup> -B1225  | GCCGCCTAGCTTCATC         |      | DWV <sup>(ABC)</sup> -B1215  | CCGTAATTCTTCAAGTTCCCA       |      |                           |                             |      |
| B        | DWV <sup>(AB)</sup> -F1153  | ATTA AAAAATGGCCTTTAGTTG  | 694  | DWV <sup>(ABC)</sup> -F1113  | TTTTCAATTTAGTTTTGAATTTGAAGG | 823  | DWV <sup>(D)</sup> -F1104 | TTTTCAATTTAGTTTTGAATTTGAAGG | 1334 |
|          | DWV <sup>(AB)</sup> -B1806  | CTTTCTAATTCAACTCACC      |      | DWV <sup>(ABC)</sup> -B1887  | GTGGTCAAACTACACTACTATC      |      | DWV <sup>(D)</sup> -B2403 | AGCACTCATCCGCAAGGG          |      |
| C        | DWV <sup>(AB)</sup> -F1725  | GATTACGAGTTAGAGTGTG      | 1407 | DWV <sup>(ABC)</sup> -F1719  | AGCAGCGAGAATATGAGTTAG       | 1470 | DWV <sup>(D)</sup> -F2271 | AAATGGATCATGCTTTAATTAGTG    | 860  |
|          | DWV <sup>(AB)</sup> -B3095  | GCTATTACTTTCTGTAAATC     |      | DWV <sup>(ABC)</sup> -B3151  | CATACTTACGCACCCACC          |      | DWV <sup>(D)</sup> -B3084 | AAA ACTATTGCTCTCTGTAAATC    |      |
| D        | DWV <sup>(AB)</sup> -F3018  | GTAGGTTAATTGTAGGTTATG    | 1344 | DWV <sup>(ABC)</sup> -F3018  | AGGTAGGTTAATTGTAGGTTATG     | 1360 |                           |                             |      |
|          | DWV <sup>(AB)</sup> -B4329  | CAATTCTATAACATTATTTACACC |      | DWV <sup>(ABC)</sup> -B4329  | TTCTAATTCTATAACATTATTTACACG |      |                           |                             |      |
| E        | DWV <sup>(AB)</sup> -F4220  | TTTGGGTACAACATCGACC      | 1485 | DWV <sup>(ABC)</sup> -F4226  | TACAACATCGTCCGGATCG         | 1536 |                           |                             |      |
|          | DWV <sup>(AB)</sup> -B5668  | CACACTGATCCCAATAATC      |      | DWV <sup>(ABC)</sup> -B5722  | TTGTAGATGTTCAACTCCCA        |      |                           |                             |      |
| F        | DWV <sup>(AB)</sup> -F5625  | ACGTGCGAGTCGTA CT        | 1706 | DWV <sup>(ABC)</sup> -F5670  | ACCCGTTATCTGATTATTGGG       | 1688 | DWV <sup>(D)</sup> -F5130 | GATTGGGTAAAATTAGCTACAG      | 2464 |
|          | DWV <sup>(AB)</sup> -B7295  | ACGCAGTTATACCAATTATAC    |      | DWV <sup>(ABC)</sup> -B7295  | GTACGCAGTTATACCAATTATAC     |      | DWV <sup>(D)</sup> -B7554 | CTTTAGGAAACACCACGCC         |      |
| G        | DWV <sup>(AB)</sup> -F7243  | CCCGTGAAAATGATTCGTG      | 1588 | DWV <sup>(ABC)</sup> -F7243  | CCCGTGAAAATGATTCGTG         | 1610 | DWV <sup>(D)</sup> -F7834 | GATAGTAACATTGTATTGGTGAC     | 965  |
|          | DWV <sup>(AB)</sup> -B8794  | CCGTGAATATAGTGTGAGG      |      | DWV <sup>(ABC)</sup> -B8811  | CAAGCATGTATCTTTCAAACAATC    |      | DWV <sup>(D)</sup> -B8765 | CTCATTAACTGCGTAGTTGAC       |      |
| H        | DWV <sup>(AB)</sup> -F8688  | GGTAAGCGATGGTTGTTTG      | 1451 | DWV <sup>(ABC)</sup> -F8718  | TGCAAGATTCGGGATGTTATC       | 1430 |                           |                             |      |
|          | DWV <sup>(AB)</sup> -B10101 | ACTATACTAAAATTAGGACGC    |      | DWV <sup>(ABC)</sup> -B10102 | GTAAA ACTATACTAAAATTAGGACGC |      |                           |                             |      |

### Supplementary Table S1: Primers for amplifying DWV strains

Primers used for amplifying and sequencing the DWV-D/EBV genome. Shown are the genome fragment (A-H), the primer names, sequences and product sizes for the three sets of primers developed: those consensual for DWV-A and DWB-B (left); those consensual for DWV-A, DWV-B and DWV-C (middle) and those specific for DWV-D/EBV (right).

| MEGA-X           | Genomic Region |          |           |                |
|------------------|----------------|----------|-----------|----------------|
|                  | UTR            | Lp       | VP        | Non-Structural |
| ML estimate      | -4852.45       | -2855.00 | -11287.30 | -19530.24      |
| Characters    nt | 1217           | 579      | 2789      | 4918           |
| Taxa             | 5              | 5        | 5         | 5              |
| ML estimate      | <i>n.a</i>     | -1506.96 | -5007.60  | -9614.84       |
| Characters    AA | <i>n.a</i>     | 180      | 927       | 1659           |
| Taxa             | <i>n.a</i>     | 5        | 5         | 5              |

**Supplementary Table S2: Numerical details of the phylogenetic analyses**

Numerical details of the phylogenetic analyses. Shown are the name of the genomic region studied; the Maximum Likelihood estimate for the most likely trees (shown in Figure 1); the number of characters included in the phylogenetic analyses and the number of taxa in the analyses. Abbreviations are: the 5' and 3' Untranslated Regions (UTR); the Lp protein (Lp); capsid proteins (VP) and the Non-Structural proteins. Analyses were conducted separately on the nucleotide (nt) and the amino acid (AA) sequences.

| Sample-ID   | Host                     | Subspecies         | Year | Location           | Country  | Lat    | Lon     | Varroa      | SRA         | Reference            | NGS      | Length | Total Reads | Total DWV | DWV-D |
|-------------|--------------------------|--------------------|------|--------------------|----------|--------|---------|-------------|-------------|----------------------|----------|--------|-------------|-----------|-------|
| 62-V_A_h2   | <i>Apis mellifera</i>    | <i>n.d.</i>        | 2015 | Big Island, Hawaii | USA      | 19,91  | -155,99 | Yes         | SRX9383000  | Brettell et al. 2020 | HiSeq    | 150    | 13158865    | 2864      | 0     |
| 126-V_W_h3  | <i>Apis mellifera</i>    | <i>n.d.</i>        | 2016 | Oahu, Hawaii       | USA      | 19,26  | -155,48 | Yes         | SRX9383069  | Brettell et al. 2020 | HiSeq    | 150    | 17565046    | 8662931   | 0     |
| 2-V_W_h1    | <i>Apis mellifera</i>    | <i>n.d.</i>        | 2015 | Big Island, Hawaii | USA      | 21,32  | -157,79 | Yes         | SRX9383040  | Brettell et al. 2020 | HiSeq    | 150    | 5057364     | 2368249   | 0     |
| 129-N_A_h6  | <i>Apis mellifera</i>    | <i>n.d.</i>        | 2016 | Kauai, Hawaii      | USA      | 19,49  | -155,91 | No          | SRX9383072  | Brettell et al. 2020 | HiSeq    | 150    | 14167416    | 14267     | 0     |
| 43-N_A_h3   | <i>Apis mellifera</i>    | <i>n.d.</i>        | 2016 | Kauai, Hawaii      | USA      | 21,97  | -159,40 | No          | SRX9383106  | Brettell et al. 2020 | HiSeq    | 150    | 9142048     | 1145      | 0     |
| 64-N_A_h4   | <i>Apis mellifera</i>    | <i>n.d.</i>        | 2016 | Kauai, Hawaii      | USA      | 21,09  | -157,01 | No          | SRX9383002  | Brettell et al. 2020 | HiSeq    | 150    | 11654794    | 3866      | 0     |
| 65-N_W_h2   | <i>Apis mellifera</i>    | <i>n.d.</i>        | 2016 | Kauai, Hawaii      | USA      | 21,09  | -157,01 | No          | SRX9383003  | Brettell et al. 2020 | HiSeq    | 150    | 12764894    | 2501      | 0     |
| 132-Var1    | <i>Varroa destructor</i> | <i>n.d.</i>        | 2015 | Oahu, Hawaii       | USA      | 22,07  | -159,66 | Yes         |             | unpublished          | HiSeq    | 150    | 14592630    | 11216540  | 0     |
| HB_S16      | <i>Apis mellifera</i>    | <i>n.d.</i>        | 2012 | Big Island, Hawaii | USA      | 19,26  | -155,48 | Yes         | SRX5654483  | Brettell et al. 2019 | HiSeq    | 100    | 12254583    | 34793     | 0     |
| HB_S40      | <i>Apis mellifera</i>    | <i>n.d.</i>        | 2012 | Big Island, Hawaii | USA      | 20,05  | -155,67 | Yes         | ERS636116   | Mordecai et al. 2016 | HiSeq    | 100    | 14207573    | 11623322  | 0     |
| V_S48       | <i>Varroa destructor</i> | <i>n.d.</i>        | 2012 | Oahu, Hawaii       | USA      | 21,30  | -157,82 | Yes         | ERS636115   | Mordecai et al. 2016 | HiSeq    | 100    | 35259211    | 31477364  | 0     |
| V_S32       | <i>Varroa destructor</i> | <i>n.d.</i>        | 2012 | Big Island, Hawaii | USA      | 20,75  | -156,00 | Yes         | SRX5654493  | Brettell et al. 2019 | HiSeq    | 100    | 13578530    | 12379171  | 0     |
| HB_S1       | <i>Apis mellifera</i>    | <i>n.d.</i>        | 2012 | Maui, Hawaii       | USA      | 20,81  | -156,29 | No          |             | unpublished          | HiSeq    | 150    | 92175914    | 13        | 0     |
| 159-UK_T_1  | <i>Apis mellifera</i>    | <i>n.d.</i>        | 2016 | England            | UK       | 50,92  | -1,75   | Yes         |             | unpublished          | HiSeq    | 150    | 14195025    | 3940973   | 0     |
| 161-UK_T_2  | <i>Apis mellifera</i>    | <i>n.d.</i>        | 2016 | Wales              | UK       | 52,97  | -4,06   | Yes         |             | unpublished          | HiSeq    | 150    | 16000811    | 918635    | 0     |
| 160-UK_U_1  | <i>Apis mellifera</i>    | <i>n.d.</i>        | 2016 | England            | UK       | 51,48  | -1,08   | Yes         |             | unpublished          | HiSeq    | 150    | 19561395    | 5247778   | 0     |
| 163-UK_U_2  | <i>Apis mellifera</i>    | <i>n.d.</i>        | 2016 | England            | UK       | 51,02  | -1,10   | Yes         |             | unpublished          | HiSeq    | 150    | 15741639    | 8069083   | 0     |
| 145-UK_U_5  | <i>Apis mellifera</i>    | <i>n.d.</i>        | 2016 | Wales              | UK       | 51,61  | -3,60   | Yes         |             | unpublished          | HiSeq    | 150    | 23341207    | 6958930   | 0     |
| 146-UK_U_6  | <i>Apis mellifera</i>    | <i>n.d.</i>        | 2016 | Wales              | UK       | 53,16  | -3,85   | Yes         |             | unpublished          | HiSeq    | 150    | 30700527    | 24053242  | 0     |
| 157-USA_T_5 | <i>Apis mellifera</i>    | <i>n.d.</i>        | 2016 | California         | USA      | 39,21  | -121,05 | Yes         |             | unpublished          | HiSeq    | 150    | 6858756     | 3551      | 0     |
| 140-USA_T_6 | <i>Apis mellifera</i>    | <i>n.d.</i>        | 2016 | Missouri           | USA      | 36,88  | -90,04  | Yes         |             | unpublished          | HiSeq    | 150    | 9943641     | 621270    | 0     |
| 154-USA_U_8 | <i>Apis mellifera</i>    | <i>n.d.</i>        | 2016 | Oklahoma           | USA      | 34,92  | -95,76  | Yes         |             | unpublished          | HiSeq    | 150    | 9986613     | 4173      | 0     |
| 156-USA_U_9 | <i>Apis mellifera</i>    | <i>n.d.</i>        | 2016 | Virginia           | USA      | 37,49  | -78,59  | Yes         |             | unpublished          | HiSeq    | 150    | 10510097    | 3154161   | 0     |
| 134-AHB1    | <i>Apis mellifera</i>    | <i>Africanized</i> | 2017 | Cruz das Almas     | Brazil   | -12,66 | -39,09  | Yes         |             | unpublished          | HiSeq    | 150    | 23217356    | 20532     | 0     |
| 135-AHB2    | <i>Apis mellifera</i>    | <i>Africanized</i> | 2017 | Cruz das Almas     | Brazil   | -12,66 | -39,09  | Yes         |             | unpublished          | HiSeq    | 150    | 18205415    | 17578     | 0     |
| 136-AHB3    | <i>Apis mellifera</i>    | <i>Africanized</i> | 2017 | Cruz das Almas     | Brazil   | -12,66 | -39,09  | Yes         |             | unpublished          | HiSeq    | 150    | 12272355    | 48422     | 0     |
| 137-AHB4    | <i>Apis mellifera</i>    | <i>Africanized</i> | 2017 | Cruz das Almas     | Brazil   | -12,66 | -39,09  | Yes         |             | unpublished          | HiSeq    | 150    | 11169414    | 10507     | 0     |
| AB3         | <i>Apis mellifera</i>    | <i>intermissa</i>  | 2013 | Bleda              | Algeria  | 36,51  | 2,78    | Yes         | PRJNA437730 | Haddad et al. 2018   | HiSeq    | 100    | 22438819    | 78055     | 0     |
| AV6         | <i>Varroa destructor</i> | -                  | 2013 | Bleda              | Algeria  | 36,51  | 2,78    | Yes         | PRJNA437731 | Haddad et al. 2018   | HiSeq    | 100    | 35486417    | 14157     | 0     |
| SB2         | <i>Apis mellifera</i>    | <i>syriaca</i>     | 2013 | Maru               | Jordan   | 32,61  | 35,90   | Yes         | PRJNA437728 | Haddad et al. 2018   | HiSeq    | 100    | 34851751    | 500509    | 0     |
| SV5         | <i>Varroa destructor</i> | -                  | 2013 | Maru               | Jordan   | 32,61  | 35,90   | Yes         | PRJNA437729 | Haddad et al. 2018   | HiSeq    | 100    | 36692614    | 457153    | 0     |
| IB1         | <i>Apis mellifera</i>    | <i>ligustica</i>   | 2016 | Zrifin             | Israel   | 31,96  | 34,84   | Yes         | PRJNA329428 | Levin et al. 2019    | HiSeq    | 100    | 31221496    | 594906    | 0     |
| IV4         | <i>Varroa destructor</i> | -                  | 2016 | Zrifin             | Israel   | 31,96  | 34,84   | Yes         | PRJNA329427 | Levin et al. 2019    | HiSeq    | 100    | 30500539    | 759633    | 0     |
| BCER        | <i>Apis cerana</i>       | <i>indica</i>      | 2016 | Phrae              | Thailand | 18,20  | 100,10  | Yes         | PRJNA475853 | Levin et al. 2019    | HiSeq    | 100    | 84071155    | 0         | 0     |
| VCER        | <i>Varroa jacobsoni</i>  | -                  | 2016 | Phrae              | Thailand | 18,20  | 100,10  | Yes         | PRJNA475855 | Levin et al. 2019    | HiSeq    | 100    | 127875113   | 0         | 0     |
| Bp1_Ls      | <i>Bombus pascuorum</i>  | -                  | 2019 | East Flanders      | Belgium  | 51,04  | 3,73    | <i>n.a.</i> |             | unpublished          | HiSeq PE | 50     | 10082822    | 0         | 0     |
| Bp2_Ls      | <i>Bombus pascuorum</i>  | -                  | 2019 | East Flanders      | Belgium  | 51,06  | 3,73    | <i>n.a.</i> |             | unpublished          | HiSeq PE | 50     | 11624213    | 0         | 0     |
| Bp3_Ls      | <i>Bombus pascuorum</i>  | -                  | 2019 | East Flanders      | Belgium  | 51,02  | 3,72    | <i>n.a.</i> |             | unpublished          | HiSeq PE | 50     | 9110288     | 0         | 0     |
| Bp4_Ls      | <i>Bombus pascuorum</i>  | -                  | 2019 | East Flanders      | Belgium  | 51,03  | 3,73    | <i>n.a.</i> |             | unpublished          | HiSeq PE | 50     | 10591507    | 0         | 0     |
| Bp5_Ls      | <i>Bombus pascuorum</i>  | -                  | 2020 | East Flanders      | Belgium  | 50,94  | 3,13    | <i>n.a.</i> |             | unpublished          | HiSeq PE | 50     | 9749758     | 0         | 0     |
| Bp6_Ls      | <i>Bombus pascuorum</i>  | -                  | 2019 | East Flanders      | Belgium  | 50,94  | 3,14    | <i>n.a.</i> |             | unpublished          | HiSeq PE | 50     | 10657920    | 0         | 0     |

|              |                          |                 |      |                  |              |        |        |      |            |                     |          |     |           |          |   |
|--------------|--------------------------|-----------------|------|------------------|--------------|--------|--------|------|------------|---------------------|----------|-----|-----------|----------|---|
| Bp7_Ls       | <i>Bombus pascuorum</i>  | -               | 2019 | East Flanders    | Belgium      | 50,83  | 3,69   | n.a. |            | unpublished         | HiSeq PE | 50  | 11145742  | 0        | 0 |
| Bp8_Ls       | <i>Bombus pascuorum</i>  | -               | 2019 | East Flanders    | Belgium      | 50,84  | 3,70   | n.a. |            | unpublished         | HiSeq PE | 50  | 10282459  | 0        | 0 |
| Bp17_Ls      | <i>Bombus pascuorum</i>  | -               | 2019 | East Flanders    | Belgium      | 51,14  | 3,59   | n.a. |            | unpublished         | HiSeq PE | 50  | 8840780   | 0        | 0 |
| Bp18_Ls      | <i>Bombus pascuorum</i>  | -               | 2019 | East Flanders    | Belgium      | 51,14  | 3,57   | n.a. |            | unpublished         | HiSeq PE | 50  | 9723808   | 0        | 0 |
| Bp19_Ls      | <i>Bombus pascuorum</i>  | -               | 2019 | East Flanders    | Belgium      | 50,93  | 3,59   | n.a. |            | unpublished         | HiSeq PE | 50  | 9764973   | 0        | 0 |
| Bp20_Ls      | <i>Bombus pascuorum</i>  | -               | 2019 | East Flanders    | Belgium      | 50,93  | 3,58   | n.a. |            | unpublished         | HiSeq PE | 50  | 10332530  | 0        | 0 |
| PBS3         | <i>Bombus terrestris</i> | -               | 2015 | Rearing facility | Belgium      | 51,13  | 4,89   | n.a. |            | unpublished         | HiSeq PE | 50  | 1113410   | 17       | 0 |
| PBS4         | <i>Bombus terrestris</i> | -               | 2016 | Rearing facility | Belgium      | 51,13  | 4,89   | n.a. |            | unpublished         | HiSeq PE | 50  | 786193    | 0        | 0 |
| PBS5         | <i>Bombus terrestris</i> | -               | 2017 | Rearing facility | Belgium      | 51,13  | 4,89   | n.a. |            | unpublished         | HiSeq PE | 50  | 1123440   | 2        | 0 |
| PBS6         | <i>Bombus terrestris</i> | -               | 2018 | Rearing facility | Belgium      | 51,13  | 4,89   | n.a. |            | unpublished         | HiSeq PE | 50  | 1118470   | 63       | 0 |
| DWVPO-2013   | <i>Apis mellifera</i>    | <i>carnica</i>  | 2013 | Hohen Neuendorf  | Germany      | 52,68  | 13,27  | Yes  | MH678671.1 | Gisder et al. 2018  | MiSeq V3 | 300 | 983318    | 81060    | 0 |
| DWVPO-2016   | <i>Apis mellifera</i>    | <i>carnica</i>  | 2016 | Hohen Neuendorf  | Germany      | 52,68  | 13,27  | Yes  | MH678672.1 | Gisder et al. 2018  | MiSeq V3 | 300 | 581066    | 580178   | 0 |
| DWVPO-2017   | <i>Apis mellifera</i>    | <i>carnica</i>  | 2017 | Hohen Neuendorf  | Germany      | 52,68  | 13,27  | Yes  | MH678673.1 | Gisder et al. 2018  | MiSeq V3 | 300 | 663602    | 656048   | 0 |
| DWVPI-2014   | <i>Apis mellifera</i>    | <i>carnica</i>  | 2014 | Hohen Neuendorf  | Germany      | 52,68  | 13,27  | No   | MH678668.1 | Gisder et al. 2018  | MiSeq V3 | 300 | 1858182   | 173846   | 0 |
| DWVP1-2016   | <i>Apis mellifera</i>    | <i>carnica</i>  | 2016 | Hohen Neuendorf  | Germany      | 52,68  | 13,27  | No   | MH678669.1 | Gisder et al. 2018  | MiSeq V3 | 300 | 639614    | 637288   | 0 |
| DWVP1-2017   | <i>Apis mellifera</i>    | <i>carnica</i>  | 2017 | Hohen Neuendorf  | Germany      | 52,68  | 13,27  | No   | MH678670.1 | Gisder et al. 2018  | MiSeq V3 | 300 | 783942    | 773548   | 0 |
| Am1          | <i>Apis mellifera</i>    | <i>n.d.</i>     | 2016 | Berkshire        | England      | 51,49  | -1,17  | Yes  |            | unpublished         | HiSeq    | 100 | 217719390 | 6623508  | 0 |
| Am2          | <i>Apis mellifera</i>    | <i>n.d.</i>     | 2016 | Berkshire        | England      | 51,49  | -1,17  | Yes  |            | unpublished         | HiSeq    | 100 | 246032444 | 17335575 | 0 |
| Am3          | <i>Apis mellifera</i>    | <i>n.d.</i>     | 2016 | Berkshire        | England      | 51,49  | -1,17  | Yes  |            | unpublished         | HiSeq    | 100 | 227050968 | 6841306  | 0 |
| Bt1          | <i>Bombus terrestris</i> | -               | 2016 | Berkshire        | England      | 51,49  | -1,17  | n.a. |            | unpublished         | HiSeq    | 100 | 224331666 | 8        | 0 |
| Bt2          | <i>Bombus terrestris</i> | -               | 2016 | Berkshire        | England      | 51,49  | -1,17  | n.a. |            | unpublished         | HiSeq    | 100 | 270180722 | 76       | 0 |
| Bt3          | <i>Bombus terrestris</i> | -               | 2016 | Berkshire        | England      | 51,49  | -1,17  | n.a. |            | unpublished         | HiSeq    | 100 | 198937166 | 12       | 0 |
| Bl1          | <i>Bombus lapidarius</i> | -               | 2016 | Berkshire        | England      | 51,49  | -1,17  | n.a. |            | unpublished         | HiSeq    | 100 | 254351158 | 71       | 0 |
| Bl2          | <i>Bombus lapidarius</i> | -               | 2016 | Berkshire        | England      | 51,49  | -1,17  | n.a. |            | unpublished         | HiSeq    | 100 | 174248630 | 103      | 0 |
| Bl3          | <i>Bombus lapidarius</i> | -               | 2016 | Berkshire        | England      | 51,49  | -1,17  | n.a. |            | unpublished         | HiSeq    | 100 | 232558976 | 90       | 0 |
| Ma-S1        | <i>Apis mellifera</i>    | <i>n.d.</i>     | 2017 | Provence         | France       | 44,05  | 5,13   | Yes  |            | unpublished         | DNBSEQ   | 100 | 12721044  | 11337251 | 0 |
| Ma-S2        | <i>Apis mellifera</i>    | <i>n.d.</i>     | 2017 | Provence         | France       | 44,05  | 5,13   | Yes  |            | unpublished         | DNBSEQ   | 100 | 14270082  | 9774020  | 0 |
| Ma-S5        | <i>Apis mellifera</i>    | <i>n.d.</i>     | 2017 | Provence         | France       | 44,05  | 5,13   | Yes  |            | unpublished         | DNBSEQ   | 100 | 16342718  | 4954143  | 0 |
| Ma-S6        | <i>Apis mellifera</i>    | <i>n.d.</i>     | 2017 | Provence         | France       | 44,05  | 5,13   | Yes  |            | unpublished         | DNBSEQ   | 100 | 18598430  | 36931    | 0 |
| Bo-T1        | <i>Apis mellifera</i>    | <i>n.d.</i>     | 2017 | Provence         | France       | 43,84  | 4,88   | Yes  |            | unpublished         | DNBSEQ   | 100 | 17611170  | 3537738  | 0 |
| Bo-T3        | <i>Apis mellifera</i>    | <i>n.d.</i>     | 2017 | Provence         | France       | 43,84  | 4,88   | Yes  |            | unpublished         | DNBSEQ   | 100 | 18285358  | 4014996  | 0 |
| Ma-T1        | <i>Apis mellifera</i>    | <i>n.d.</i>     | 2017 | Provence         | France       | 44,05  | 5,13   | Yes  |            | unpublished         | DNBSEQ   | 100 | 16638864  | 3907767  | 0 |
| Ma-T5        | <i>Apis mellifera</i>    | <i>n.d.</i>     | 2017 | Provence         | France       | 44,05  | 5,13   | Yes  |            | unpublished         | DNBSEQ   | 100 | 15211406  | 5363392  | 0 |
| 443          | <i>Apis mellifera</i>    | <i>n.d.</i>     | 2018 | Provence         | France       | 44,05  | 5,13   | Yes  |            | unpublished         | DNBSEQ   | 100 | 15336914  | 7702253  | 0 |
| 404          | <i>Apis mellifera</i>    | <i>n.d.</i>     | 2018 | Provence         | France       | 44,05  | 5,13   | Yes  |            | unpublished         | DNBSEQ   | 100 | 18218788  | 15128    | 0 |
| 418          | <i>Apis mellifera</i>    | <i>n.d.</i>     | 2018 | Provence         | France       | 44,05  | 5,13   | Yes  |            | unpublished         | DNBSEQ   | 100 | 14865942  | 8401728  | 0 |
| 442          | <i>Apis mellifera</i>    | <i>n.d.</i>     | 2018 | Provence         | France       | 44,05  | 5,13   | Yes  |            | unpublished         | DNBSEQ   | 100 | 15594840  | 6347730  | 0 |
| NG-7006_C1   | <i>Apis mellifera</i>    | <i>n.d.</i>     | 2013 | Warwick          | England      | 52,38  | -1,56  | Yes  | PRJEB5249  | Ryabov et al. 2014  | HiSeq    | 101 | 10069125  | 4269120  | 0 |
| NG-7006_E7   | <i>Apis mellifera</i>    | <i>n.d.</i>     | 2013 | Warwick          | England      | 52,38  | -1,56  | Yes  | PRJEB5249  | Ryabov et al. 2014  | HiSeq    | 101 | 8843179   | 6545702  | 0 |
| B2_Hem       | <i>Apis mellifera</i>    | <i>n.d.</i>     | 2010 | Texas, Maryland  | USA          | 39,03  | -76,92 | Yes  | SRP135682  | Ryabov et al. 2017  | HiSeq    | 101 | 25758539  | 13803868 | 0 |
| B2_PBS       | <i>Apis mellifera</i>    | <i>n.d.</i>     | 2010 | Texas            | USA          | 29,23  | -95,35 | Yes  | SRP135682  | Ryabov et al. 2017  | HiSeq    | 101 | 20353326  | 3906878  | 0 |
| V31_PBS      | <i>Apis mellifera</i>    | <i>n.d.</i>     | 2016 | Texas            | USA          | 29,23  | -95,35 | Yes  | SRP135682  | Ryabov et al. 2017  | HiSeq    | 150 | 14218987  | 71662    | 0 |
| V99_VIROCT15 | <i>Apis mellifera</i>    | <i>n.d.</i>     | 2015 | Maryland         | USA          | 39,03  | -76,92 | Yes  | SRP135682  | Ryabov et al. 2017  | HiSeq    | 150 | 14493557  | 14258748 | 0 |
| SA_SB_C1     | <i>Apis mellifera</i>    | <i>capensis</i> | 2013 | Stellenbosch     | South Africa | -33,95 | 18,84  | Yes  | SRX2422224 | Remnant et al. 2017 | HiSeq    | 100 | 89462246  | 17058    | 0 |
| SA_SB_K2     | <i>Apis mellifera</i>    | <i>capensis</i> | 2013 | Stellenbosch     | South Africa | -33,95 | 18,84  | Yes  | SRX2422218 | Remnant et al. 2017 | HiSeq    | 100 | 84044582  | 12677    | 0 |

|           |                          |                 |      |                 |              |        |         |     |            |                     |       |     |          |          |   |
|-----------|--------------------------|-----------------|------|-----------------|--------------|--------|---------|-----|------------|---------------------|-------|-----|----------|----------|---|
| SA_SB_A8  | <i>Apis mellifera</i>    | <i>capensis</i> | 2013 | Stellenbosch    | South Africa | -33,95 | 18,84   | Yes |            | unpublished         | HiSeq | 100 | 97631138 | 8768     | 0 |
| SA_RI_A   | <i>Apis mellifera</i>    | <i>capensis</i> | 2013 | Robben Island   | South Africa | -33,81 | 18,37   | Yes | SRX2422212 | Remnant et al. 2017 | HiSeq | 100 | 40214438 | 1571     | 0 |
| SA_RI_11  | <i>Apis mellifera</i>    | <i>capensis</i> | 2013 | Robben Island   | South Africa | -33,81 | 18,37   | Yes | SRX2422225 | Remnant et al. 2017 | HiSeq | 100 | 41030460 | 2358     | 0 |
| SA_RI_49  | <i>Apis mellifera</i>    | <i>capensis</i> | 2013 | Robben Island   | South Africa | -33,81 | 18,37   | Yes | SRX2422223 | Remnant et al. 2017 | HiSeq | 100 | 37640156 | 1642     | 0 |
| SA_RI_48  | <i>Apis mellifera</i>    | <i>capensis</i> | 2013 | Robben Island   | South Africa | -33,81 | 18,37   | Yes |            | unpublished         | HiSeq | 100 | 34889486 | 556      | 0 |
| SA_RI_IS7 | <i>Apis mellifera</i>    | <i>capensis</i> | 2013 | Robben Island   | South Africa | -33,81 | 18,37   | Yes |            | unpublished         | HiSeq | 100 | 32786158 | 62       | 0 |
| T_E13     | <i>Apis mellifera</i>    | <i>n.d.</i>     | 2015 | Eua             | Tonga        | -21,36 | -174,97 | No  |            | unpublished         | HiSeq | 100 | 40443878 | 3390     | 0 |
| T_E17     | <i>Apis mellifera</i>    | <i>n.d.</i>     | 2015 | Eua             | Tonga        | -21,37 | -174,95 | No  |            | unpublished         | HiSeq | 100 | 40610394 | 3352     | 0 |
| T_T12     | <i>Apis mellifera</i>    | <i>n.d.</i>     | 2015 | Tongatapu       | Tonga        | -21,15 | -175,19 | No  | SRX2422220 | Remnant et al. 2017 | HiSeq | 100 | 42283492 | 3135     | 0 |
| T_T23     | <i>Apis mellifera</i>    | <i>n.d.</i>     | 2015 | Tongatapu       | Tonga        | -21,13 | -175,21 | No  | SRX2422226 | Remnant et al. 2017 | HiSeq | 100 | 38406846 | 2253     | 0 |
| T_V9      | <i>Apis mellifera</i>    | <i>n.d.</i>     | 2015 | Vava'u          | Tonga        | -18,68 | -173,99 | Yes | SRX2422214 | Remnant et al. 2017 | HiSeq | 100 | 37316706 | 10558772 | 0 |
| T_V10     | <i>Apis mellifera</i>    | <i>n.d.</i>     | 2015 | Vava'u          | Tonga        | -18,63 | -173,95 | Yes | SRX2422213 | Remnant et al. 2017 | HiSeq | 100 | 39288984 | 7687224  | 0 |
| T_varroa1 | <i>Varroa destructor</i> | -               | 2015 | Vava'u          | Tonga        | -18,61 | -173,93 | Yes |            | unpublished         | HiSeq | 100 | 30688748 | 25292413 | 0 |
| T_varroa2 | <i>Varroa destructor</i> | -               | 2015 | Vava'u          | Tonga        | -18,65 | -173,93 | Yes |            | unpublished         | HiSeq | 100 | 31994442 | 23909818 | 0 |
| NZ_G0     | <i>Apis mellifera</i>    | <i>n.d.</i>     | 2015 | Hamilton        | New Zealand  | -37,77 | 175,31  | Yes | SRX3069206 | Remnant et al, 2019 | HiSeq | 100 | 39969370 | 35158900 | 0 |
| NZ_154    | <i>Apis mellifera</i>    | <i>n.d.</i>     | 2013 | Hamilton        | New Zealand  | -37,77 | 175,31  | Yes |            | unpublished         | HiSeq | 100 | 78597230 | 20397701 | 0 |
| NZ_267    | <i>Apis mellifera</i>    | <i>n.d.</i>     | 2013 | Hamilton        | New Zealand  | -37,77 | 175,31  | Yes |            | unpublished         | HiSeq | 100 | 84737240 | 54796927 | 0 |
| NZ_315    | <i>Apis mellifera</i>    | <i>n.d.</i>     | 2013 | Hamilton        | New Zealand  | -37,77 | 175,31  | Yes |            | unpublished         | HiSeq | 100 | 90881398 | 43988834 | 0 |
| 2a        | <i>Apis mellifera</i>    | <i>n.d.</i>     | 2012 | Dunedin         | New Zealand  | -45,86 | 170,33  | No  |            | unpublished         | HiSeq | 50  | 51664151 | 8        | 0 |
| 7b        | <i>Apis mellifera</i>    | <i>n.d.</i>     | 2012 | Dunedin         | New Zealand  | -45,87 | 170,12  | No  |            | unpublished         | HiSeq | 50  | 51590120 | 1        | 0 |
| 12b       | <i>Apis mellifera</i>    | <i>n.d.</i>     | 2012 | Dunedin         | New Zealand  | -45,97 | 170,25  | No  |            | unpublished         | HiSeq | 50  | 59039189 | 0        | 0 |
| 16a       | <i>Apis mellifera</i>    | <i>n.d.</i>     | 2012 | Dunedin         | New Zealand  | -46,11 | 170,07  | No  |            | unpublished         | HiSeq | 50  | 65648275 | 2        | 0 |
| 21b       | <i>Apis mellifera</i>    | <i>n.d.</i>     | 2012 | Chatham Islands | New Zealand  | -44,10 | -176,56 | No  |            | unpublished         | HiSeq | 50  | 62278207 | 0        | 0 |
| 27a       | <i>Apis mellifera</i>    | <i>n.d.</i>     | 2012 | Chatham Islands | New Zealand  | -44,02 | -176,63 | No  |            | unpublished         | HiSeq | 50  | 54152981 | 0        | 0 |
| 28b       | <i>Apis mellifera</i>    | <i>n.d.</i>     | 2012 | Chatham Islands | New Zealand  | -43,97 | -176,52 | No  |            | unpublished         | HiSeq | 50  | 51189322 | 0        | 0 |
| 35a       | <i>Apis mellifera</i>    | <i>n.d.</i>     | 2012 | Chatham Islands | New Zealand  | -44,01 | -176,42 | No  |            | unpublished         | HiSeq | 50  | 59844057 | 0        | 0 |
| 100b      | <i>Apis mellifera</i>    | <i>n.d.</i>     | 2013 | Dunedin         | New Zealand  | -45,86 | 170,33  | Yes |            | unpublished         | HiSeq | 50  | 48487053 | 285      | 0 |
| 102b      | <i>Apis mellifera</i>    | <i>n.d.</i>     | 2013 | Dunedin         | New Zealand  | -45,87 | 170,12  | Yes |            | unpublished         | HiSeq | 50  | 57124362 | 105      | 0 |
| 104a      | <i>Apis mellifera</i>    | <i>n.d.</i>     | 2013 | Dunedin         | New Zealand  | -45,97 | 170,25  | Yes |            | unpublished         | HiSeq | 50  | 57084491 | 314      | 0 |
| 114b      | <i>Apis mellifera</i>    | <i>n.d.</i>     | 2013 | Dunedin         | New Zealand  | -46,11 | 170,07  | Yes |            | unpublished         | HiSeq | 50  | 53839359 | 0        | 0 |
| 61a       | <i>Apis mellifera</i>    | <i>n.d.</i>     | 2012 | Central Otago   | New Zealand  | -45,01 | 169,35  | Yes |            | unpublished         | HiSeq | 50  | 53974939 | 9524     | 0 |
| 70b       | <i>Apis mellifera</i>    | <i>n.d.</i>     | 2012 | Central Otago   | New Zealand  | -44,98 | 169,48  | Yes |            | unpublished         | HiSeq | 50  | 52533961 | 4304558  | 0 |
| 72b       | <i>Apis mellifera</i>    | <i>n.d.</i>     | 2012 | Central Otago   | New Zealand  | -45,17 | 169,23  | Yes |            | unpublished         | HiSeq | 50  | 48888288 | 3961642  | 0 |
| 73b       | <i>Apis mellifera</i>    | <i>n.d.</i>     | 2012 | Central Otago   | New Zealand  | -45,10 | 169,36  | Yes |            | unpublished         | HiSeq | 50  | 68788331 | 12564    | 0 |
| 117a      | <i>Apis mellifera</i>    | <i>n.d.</i>     | 2014 | Dunedin         | New Zealand  | -45,86 | 170,33  | Yes |            | unpublished         | HiSeq | 50  | 57562118 | 33847    | 0 |
| 118a      | <i>Apis mellifera</i>    | <i>n.d.</i>     | 2014 | Dunedin         | New Zealand  | -45,87 | 170,12  | Yes |            | unpublished         | HiSeq | 50  | 54640062 | 24912    | 0 |
| 120b      | <i>Apis mellifera</i>    | <i>n.d.</i>     | 2014 | Dunedin         | New Zealand  | -45,97 | 170,25  | Yes |            | unpublished         | HiSeq | 50  | 44972661 | 4308385  | 0 |
| 128b      | <i>Apis mellifera</i>    | <i>n.d.</i>     | 2014 | Dunedin         | New Zealand  | -46,11 | 170,07  | Yes |            | unpublished         | HiSeq | 50  | 64401775 | 15927035 | 0 |
| 139a      | <i>Apis mellifera</i>    | <i>n.d.</i>     | 2014 | Central Otago   | New Zealand  | -45,01 | 169,35  | Yes |            | unpublished         | HiSeq | 50  | 57010781 | 75906    | 0 |
| 140a      | <i>Apis mellifera</i>    | <i>n.d.</i>     | 2014 | Central Otago   | New Zealand  | -44,98 | 169,48  | Yes |            | unpublished         | HiSeq | 50  | 51351641 | 1431     | 0 |
| 152b      | <i>Apis mellifera</i>    | <i>n.d.</i>     | 2014 | Central Otago   | New Zealand  | -45,17 | 169,23  | Yes |            | unpublished         | HiSeq | 50  | 56534630 | 799492   | 0 |
| 154b      | <i>Apis mellifera</i>    | <i>n.d.</i>     | 2014 | Central Otago   | New Zealand  | -45,10 | 169,36  | Yes |            | unpublished         | HiSeq | 50  | 66488340 | 2851     | 0 |
| 43a       | <i>Apis mellifera</i>    | <i>n.d.</i>     | 2012 | Nelson          | New Zealand  | -40,60 | 172,65  | Yes |            | unpublished         | HiSeq | 50  | 61220680 | 1283     | 0 |
| 51a       | <i>Apis mellifera</i>    | <i>n.d.</i>     | 2012 | Nelson          | New Zealand  | -41,18 | 172,69  | Yes |            | unpublished         | HiSeq | 50  | 78280685 | 1255     | 0 |
| 56a       | <i>Apis mellifera</i>    | <i>n.d.</i>     | 2012 | Nelson          | New Zealand  | -41,34 | 172,52  | Yes |            | unpublished         | HiSeq | 50  | 34532762 | 1141     | 0 |
| 57a       | <i>Apis mellifera</i>    | <i>n.d.</i>     | 2012 | Nelson          | New Zealand  | -41,65 | 172,33  | Yes |            | unpublished         | HiSeq | 50  | 64551924 | 789336   | 0 |



|            |                          |                  |      |                  |              |        |        |             |                |                      |             |      |          |         |   |
|------------|--------------------------|------------------|------|------------------|--------------|--------|--------|-------------|----------------|----------------------|-------------|------|----------|---------|---|
| 77b        | <i>Apis mellifera</i>    | <i>n.d.</i>      | 2012 | Hamilton         | New Zealand  | -37,24 | 175,58 | Yes         |                | unpublished          | HiSeq       | 50   | 56741027 | 3253745 | 0 |
| 88b        | <i>Apis mellifera</i>    | <i>n.d.</i>      | 2012 | Hamilton         | New Zealand  | -37,48 | 175,20 | Yes         |                | unpublished          | HiSeq       | 50   | 60354065 | 134035  | 0 |
| 91b        | <i>Apis mellifera</i>    | <i>n.d.</i>      | 2012 | Hamilton         | New Zealand  | -37,61 | 175,27 | Yes         |                | unpublished          | HiSeq       | 50   | 52590736 | 5436    | 0 |
| 93b        | <i>Apis mellifera</i>    | <i>n.d.</i>      | 2012 | Hamilton         | New Zealand  | -37,81 | 174,90 | Yes         |                | unpublished          | HiSeq       | 50   | 64970159 | 3772    | 0 |
| NT         | <i>Apis mellifera</i>    | <i>n.d.</i>      | 2014 | North Territory  | Australia    | -14,46 | 132,26 | No          | PRJNA357523    | Roberts et al. 2017  | HiSeq       | 100  | 13913678 | 991     | 0 |
| QLD        | <i>Apis mellifera</i>    | <i>n.d.</i>      | 2014 | Queensland       | Australia    | -24,84 | 152,31 | No          | PRJNA357523    | Roberts et al. 2017  | HiSeq       | 100  | 15221333 | 211     | 0 |
| WA2        | <i>Apis mellifera</i>    | <i>n.d.</i>      | 2014 | West Australia   | Australia    | -33,86 | 121,88 | No          | PRJNA357523    | Roberts et al. 2017  | HiSeq       | 100  | 23874121 | 141     | 0 |
| WA1        | <i>Apis mellifera</i>    | <i>n.d.</i>      | 2013 | West Australia   | Australia    | -30,98 | 115,70 | No          | PRJNA357523    | Roberts et al. 2017  | HiSeq       | 100  | 29197119 | 0       | 0 |
| ROB13      | <i>Apis mellifera</i>    | <i>n.d.</i>      | 2013 | SE Australia     | Australia    | -34,31 | 142,19 | No          | PRJNA357523    | Roberts et al. 2017  | HiSeq       | 100  | 28387691 | 116     | 0 |
| ROB14      | <i>Apis mellifera</i>    | <i>n.d.</i>      | 2014 | SE Australia     | Australia    | -34,31 | 142,19 | No          | PRJNA357523    | Roberts et al. 2017  | HiSeq       | 100  | 26056639 | 1       | 0 |
| VN         | <i>Apis mellifera</i>    | <i>n.d.</i>      | 2014 | SE Australia     | Australia    | -29,74 | 151,74 | No          | PRJNA357523    | Roberts et al. 2017  | HiSeq       | 101  | 23266592 | 4       | 0 |
| RE14       | <i>Apis mellifera</i>    | <i>n.d.</i>      | 2014 | South Australia  | Australia    | -35,38 | 139,57 | No          | PRJNA357523    | Roberts et al. 2017  | HiSeq       | 100  | 18247107 | 0       | 0 |
| TAS        | <i>Apis mellifera</i>    | <i>n.d.</i>      | 2014 | Tasmania         | Australia    | -41,58 | 147,18 | No          | PRJNA357523    | Roberts et al. 2017  | HiSeq       | 100  | 19492851 | 2       | 0 |
| PAM        | <i>Apis mellifera</i>    | <i>n.d.</i>      | 2014 | Highlands        | PNG          | -6,01  | 145,37 | Yes         | PRJNA357523    | Roberts et al. 2020  | HiSeq       | 100  | 24992379 | 69      | 0 |
| SAM        | <i>Apis mellifera</i>    | <i>n.d.</i>      | 2014 | Malaita          | Solomon Isl. | -8,76  | 160,70 | No          | PRJNA357523    | Roberts et al. 2020  | HiSeq       | 100  | 29987684 | 665     | 0 |
| CC-jul09   | <i>Apis mellifera</i>    | <i>n.d.</i>      | 2009 | Gotland          | Sweden       | 57,14  | 18,31  | Yes         | SRR7781384     | Thaduri et al. 2018  | Ion Torrent | 200  | 39342326 | 54878   | 0 |
| CC-aug09   | <i>Apis mellifera</i>    | <i>n.d.</i>      | 2009 | Gotland          | Sweden       | 57,14  | 18,31  | Yes         | SRR7781385     | Thaduri et al. 2018  | Ion Torrent | 200  | 37427260 | 72654   | 0 |
| CC-oct09   | <i>Apis mellifera</i>    | <i>n.d.</i>      | 2009 | Gotland          | Sweden       | 57,14  | 18,31  | Yes         | SRR7781383     | Thaduri et al. 2018  | Ion Torrent | 200  | 43216586 | 426884  | 0 |
| BC-jul09   | <i>Apis mellifera</i>    | <i>Bond</i>      | 2009 | Gotland          | Sweden       | 57,07  | 18,22  | Yes         | SRR7781388     | Thaduri et al. 2018  | Ion Torrent | 200  | 42307887 | 844603  | 0 |
| BC-aug09   | <i>Apis mellifera</i>    | <i>Bond</i>      | 2009 | Gotland          | Sweden       | 57,07  | 18,22  | Yes         | SRR7781389     | Thaduri et al. 2018  | Ion Torrent | 200  | 37789206 | 205090  | 0 |
| BC-oct09   | <i>Apis mellifera</i>    | <i>Bond</i>      | 2009 | Gotland          | Sweden       | 57,07  | 18,22  | Yes         | SRR7781386     | Thaduri et al. 2018  | Ion Torrent | 200  | 43092165 | 348965  | 0 |
| BC-may10   | <i>Apis mellifera</i>    | <i>Bond</i>      | 2010 | Gotland          | Sweden       | 57,07  | 18,22  | Yes         | SRR7781387     | Thaduri et al. 2018  | Ion Torrent | 200  | 41297699 | 273009  | 0 |
| MS-apr15   | <i>Apis mellifera</i>    | <i>n.d.</i>      | 2015 | Uppsala          | Sweden       | 59,82  | 17,66  | Yes         | SRX13254142    | Thaduri et al. 2021  | Ion S5XL    | 200  | 28527353 | 763     | 0 |
| MS-jun15   | <i>Apis mellifera</i>    | <i>n.d.</i>      | 2015 | Uppsala          | Sweden       | 59,82  | 17,66  | Yes         | SRX13254143    | Thaduri et al. 2021  | Ion S5XL    | 200  | 30093353 | 40      | 0 |
| MS-aug15   | <i>Apis mellifera</i>    | <i>n.d.</i>      | 2015 | Uppsala          | Sweden       | 59,82  | 17,66  | Yes         | SRX13254144    | Thaduri et al. 2021  | Ion S5XL    | 200  | 31120511 | 15429   | 0 |
| MS-sep15   | <i>Apis mellifera</i>    | <i>n.d.</i>      | 2015 | Uppsala          | Sweden       | 59,82  | 17,66  | Yes         | SRX13254145    | Thaduri et al. 2021  | Ion S5XL    | 200  | 28612326 | 72009   | 0 |
| MS-oct15   | <i>Apis mellifera</i>    | <i>n.d.</i>      | 2015 | Uppsala          | Sweden       | 59,82  | 17,66  | Yes         | SRX13254146    | Thaduri et al. 2021  | Ion S5XL    | 200  | 32478179 | 111455  | 0 |
| MR-apr15   | <i>Apis mellifera</i>    | <i>Bond</i>      | 2015 | Uppsala          | Sweden       | 59,82  | 17,66  | Yes         | SRX13254138    | Thaduri et al. 2021  | Ion S5XL    | 200  | 30001744 | 12      | 0 |
| MR-jun15   | <i>Apis mellifera</i>    | <i>Bond</i>      | 2015 | Uppsala          | Sweden       | 59,82  | 17,66  | Yes         | SRX13254139    | Thaduri et al. 2021  | Ion S5XL    | 200  | 27156406 | 54      | 0 |
| MR-aug15   | <i>Apis mellifera</i>    | <i>Bond</i>      | 2015 | Uppsala          | Sweden       | 59,82  | 17,66  | Yes         | SRX13254140    | Thaduri et al. 2021  | Ion S5XL    | 200  | 30170963 | 348965  | 0 |
| MR-sep15   | <i>Apis mellifera</i>    | <i>Bond</i>      | 2015 | Uppsala          | Sweden       | 59,82  | 17,66  | Yes         | SRX13254141    | Thaduri et al. 2021  | Ion S5XL    | 200  | 30365924 | 207120  | 0 |
| MR-oct15   | <i>Apis mellifera</i>    | <i>Bond</i>      | 2015 | Uppsala          | Sweden       | 59,82  | 17,66  | Yes         | SRX13254142    | Thaduri et al. 2021  | Ion S5XL    | 200  | 31030845 | 320429  | 0 |
| BB-BioBest | <i>Bombus terrestris</i> | -                | 2018 | Rearing facility | Belgium      | 51,13  | 4,89   | <i>n.a.</i> |                | unpublished          | Ion S5XL    | 300  | 2615564  | 0       | 0 |
| BB-Koppert | <i>Bombus terrestris</i> | -                | 2018 | Rearing facility | Netherlands  | 51,98  | 4,46   | <i>n.a.</i> |                | unpublished          | Ion S5XL    | 300  | 2402352  | 0       | 0 |
| BB-Sweden  | <i>Bombus spp</i>        | <i>8 species</i> | 2018 | Skåne            | Sweden       | 55,61  | 13,63  | <i>n.a.</i> |                | unpublished          | Ion S5XL    | 300  | 2375547  | 1       | 0 |
| 4782 (RL2) | <i>Apis mellifera</i>    | <i>n.d.</i>      | 2010 | Navarra          | Spain        | 42,70  | -1,70  | <i>n.a.</i> | SRX13269450/51 | Granberg et al. 2013 | 454         | ~255 | 241960   | 0       | 0 |
| AA24115    | <i>Apis mellifera</i>    | <i>n.d.</i>      | 2019 | Peyad            | India        | 8,52   | 77,02  | Yes         |                | unpublished          | DNBseq      | 100  | 41838962 | 0       | 0 |
| AA25373    | <i>Apis cerana</i>       | <i>indica</i>    | 2019 | Peyad            | India        | 8,52   | 77,02  | Yes         |                | unpublished          | DNBseq      | 100  | 40807136 | 0       | 0 |
| AA26343    | <i>Apis mellifera</i>    | <i>n.d.</i>      | 2019 | Malayam          | India        | 8,48   | 77,02  | Yes         |                | unpublished          | DNBseq      | 100  | 41358769 | 2       | 0 |
| AA25369    | <i>Apis cerana</i>       | <i>indica</i>    | 2019 | Malayam          | India        | 8,48   | 77,02  | Yes         |                | unpublished          | DNBseq      | 100  | 34551307 | 1       | 0 |
| AA24018    | <i>Apis cerana</i>       | <i>indica</i>    | 2019 | Vithura          | India        | 8,68   | 77,14  | Yes         |                | unpublished          | DNBseq      | 100  | 37675280 | 0       | 0 |
| AA25485    | <i>Apis cerana</i>       | <i>indica</i>    | 2019 | Trivandrum       | India        | 8,43   | 76,99  | Yes         |                | unpublished          | DNBseq      | 100  | 48934633 | 0       | 0 |
| AA23630    | <i>Apis cerana</i>       | <i>indica</i>    | 2019 | Kadakkal         | India        | 8,83   | 76,92  | Yes         |                | unpublished          | DNBseq      | 100  | 37861683 | 0       | 0 |
| AA26132    | <i>Apis cerana</i>       | <i>indica</i>    | 2019 | Marthrandam      | India        | 8,31   | 77,21  | Yes         |                | unpublished          | DNBseq      | 100  | 37770079 | 3       | 0 |
| AA23792    | <i>Apis mellifera</i>    | <i>n.d.</i>      | 2019 | Alakode          | India        | 12,19  | 75,46  | Yes         |                | unpublished          | DNBseq      | 100  | 41221284 | 1       | 0 |
| AA26422    | <i>Apis cerana</i>       | <i>indica</i>    | 2019 | Alakode          | India        | 12,19  | 75,46  | Yes         |                | unpublished          | DNBseq      | 100  | 36368431 | 0       | 0 |

|         |                          |               |      |             |         |       |       |             |             |                      |         |     |          |         |   |
|---------|--------------------------|---------------|------|-------------|---------|-------|-------|-------------|-------------|----------------------|---------|-----|----------|---------|---|
| AA26141 | <i>Apis mellifera</i>    | <i>n.d.</i>   | 2019 | Nallompuzha | India   | 12,30 | 75,37 | Yes         |             | unpublished          | DNBseq  | 100 | 41359560 | 0       | 0 |
| AA25882 | <i>Apis cerana</i>       | <i>indica</i> | 2019 | Nallompuzha | India   | 12,30 | 75,37 | Yes         |             | unpublished          | DNBseq  | 100 | 32129942 | 0       | 0 |
| BBt     | <i>Bombus terrestris</i> | -             | 2015 | Le Conquet  | France  | 48,36 | -4,77 | <i>n.a.</i> |             | unpublished          | MiSeq   | 250 | 431974   | 0       | 0 |
| BHb     | <i>Apis mellifera</i>    | <i>n.d.</i>   | 2015 | Le Conquet  | France  | 48,36 | -4,77 | Yes         |             | unpublished          | MiSeq   | 250 | 288071   | 11528   | 0 |
| LBt     | <i>Bombus terrestris</i> | -             | 2015 | Liverpool   | UK      | 53,41 | -2,99 | <i>n.a.</i> |             | unpublished          | MiSeq   | 250 | 585487   | 2       | 0 |
| LHb     | <i>Apis mellifera</i>    | <i>n.d.</i>   | 2015 | Liverpool   | UK      | 53,41 | -2,99 | Yes         |             | unpublished          | MiSeq   | 250 | 320740   | 11277   | 0 |
| MBt     | <i>Bombus terrestris</i> | -             | 2015 | Isle of Man | UK      | 54,15 | -4,49 | <i>n.a.</i> |             | unpublished          | MiSeq   | 250 | 520299   | 0       | 0 |
| MHb     | <i>Apis mellifera</i>    | <i>n.d.</i>   | 2015 | Isle of Man | UK      | 54,15 | -4,49 | No          |             | unpublished          | MiSeq   | 250 | 422457   | 0       | 0 |
| Ubt     | <i>Bombus terrestris</i> | -             | 2015 | Ouessant    | France  | 48,46 | -5,09 | <i>n.a.</i> |             | unpublished          | MiSeq   | 250 | 323970   | 0       | 0 |
| UHb     | <i>Apis mellifera</i>    | <i>n.d.</i>   | 2015 | Ouessant    | France  | 48,46 | -5,09 | No          |             | unpublished          | MiSeq   | 250 | 258823   | 0       | 0 |
| BP1     | <i>Apis mellifera</i>    | <i>n.d.</i>   | 2012 | Flanders    | Belgium | 51,03 | 3,96  | Yes         | SRR10418397 | Deboutte et al. 2020 | NextSeq | 150 | 5957498  | 4161    | 0 |
| BP2     | <i>Apis mellifera</i>    | <i>n.d.</i>   | 2012 | Flanders    | Belgium | 51,03 | 3,96  | Yes         | SRR10418396 | Deboutte et al. 2020 | NextSeq | 150 | 23930704 | 6480    | 0 |
| BP3     | <i>Apis mellifera</i>    | <i>n.d.</i>   | 2012 | Flanders    | Belgium | 51,15 | 4,46  | Yes         | SRR10418383 | Deboutte et al. 2020 | NextSeq | 150 | 6934898  | 208     | 0 |
| BP4     | <i>Apis mellifera</i>    | <i>n.d.</i>   | 2012 | Flanders    | Belgium | 51,15 | 4,46  | Yes         | SRR10418372 | Deboutte et al. 2020 | NextSeq | 150 | 8468066  | 83164   | 0 |
| BP5     | <i>Apis mellifera</i>    | <i>n.d.</i>   | 2012 | Flanders    | Belgium | 50,90 | 4,10  | Yes         | SRR10418361 | Deboutte et al. 2020 | NextSeq | 150 | 24903398 | 44385   | 0 |
| BP6     | <i>Apis mellifera</i>    | <i>n.d.</i>   | 2012 | Flanders    | Belgium | 51,18 | 3,54  | Yes         | SRR10418350 | Deboutte et al. 2020 | NextSeq | 150 | 31654094 | 4298637 | 0 |
| BP7     | <i>Apis mellifera</i>    | <i>n.d.</i>   | 2012 | Flanders    | Belgium | 51,18 | 3,54  | Yes         | SRR10418339 | Deboutte et al. 2020 | NextSeq | 150 | 34427402 | 1752343 | 0 |
| BP8     | <i>Apis mellifera</i>    | <i>n.d.</i>   | 2012 | Flanders    | Belgium | 50,90 | 4,10  | Yes         | SRR10418328 | Deboutte et al. 2020 | NextSeq | 150 | 27288860 | 3342220 | 0 |
| BP9     | <i>Apis mellifera</i>    | <i>n.d.</i>   | 2012 | Flanders    | Belgium | 51,09 | 3,17  | Yes         | SRR10418317 | Deboutte et al. 2020 | NextSeq | 150 | 7462686  | 2340907 | 0 |
| BP10    | <i>Apis mellifera</i>    | <i>n.d.</i>   | 2012 | Flanders    | Belgium | 51,09 | 3,17  | Yes         | SRR10418306 | Deboutte et al. 2020 | NextSeq | 150 | 7882664  | 1205660 | 0 |
| BP11    | <i>Apis mellifera</i>    | <i>n.d.</i>   | 2012 | Flanders    | Belgium | 50,83 | 4,76  | Yes         | SRR10418395 | Deboutte et al. 2020 | NextSeq | 150 | 7982402  | 49383   | 0 |
| BP12    | <i>Apis mellifera</i>    | <i>n.d.</i>   | 2012 | Flanders    | Belgium | 50,83 | 4,76  | Yes         | SRR10418392 | Deboutte et al. 2020 | NextSeq | 150 | 7332184  | 974166  | 0 |
| BP13    | <i>Apis mellifera</i>    | <i>n.d.</i>   | 2012 | Flanders    | Belgium | 51,04 | 5,38  | Yes         | SRR10418391 | Deboutte et al. 2020 | NextSeq | 150 | 25168634 | 9074    | 0 |
| BP14    | <i>Apis mellifera</i>    | <i>n.d.</i>   | 2012 | Flanders    | Belgium | 51,04 | 5,38  | Yes         | SRR10418390 | Deboutte et al. 2020 | NextSeq | 150 | 31393490 | 3208315 | 0 |
| BP15    | <i>Apis mellifera</i>    | <i>n.d.</i>   | 2012 | Flanders    | Belgium | 50,87 | 5,30  | Yes         | SRR10418389 | Deboutte et al. 2020 | NextSeq | 150 | 45010868 | 3047    | 0 |
| BP16    | <i>Apis mellifera</i>    | <i>n.d.</i>   | 2012 | Flanders    | Belgium | 50,87 | 5,30  | Yes         | SRR10418388 | Deboutte et al. 2020 | NextSeq | 150 | 24146430 | 2040    | 0 |
| BP17    | <i>Apis mellifera</i>    | <i>n.d.</i>   | 2012 | Flanders    | Belgium | 51,02 | 4,85  | Yes         | SRR10418387 | Deboutte et al. 2020 | NextSeq | 150 | 6343574  | 6234    | 0 |
| BP18    | <i>Apis mellifera</i>    | <i>n.d.</i>   | 2012 | Flanders    | Belgium | 51,02 | 4,85  | Yes         | SRR10418386 | Deboutte et al. 2020 | NextSeq | 150 | 7604626  | 57442   | 0 |
| BP19    | <i>Apis mellifera</i>    | <i>n.d.</i>   | 2012 | Flanders    | Belgium | 51,13 | 3,89  | Yes         | SRR10418385 | Deboutte et al. 2020 | NextSeq | 150 | 6504826  | 74207   | 0 |
| BP20    | <i>Apis mellifera</i>    | <i>n.d.</i>   | 2012 | Flanders    | Belgium | 51,13 | 3,89  | Yes         | SRR10418384 | Deboutte et al. 2020 | NextSeq | 150 | 7244666  | 1399125 | 0 |
| BP21    | <i>Apis mellifera</i>    | <i>n.d.</i>   | 2012 | Flanders    | Belgium | 50,97 | 3,09  | Yes         | SRR10418382 | Deboutte et al. 2020 | NextSeq | 150 | 13414762 | 1607436 | 0 |
| BP22    | <i>Apis mellifera</i>    | <i>n.d.</i>   | 2012 | Flanders    | Belgium | 51,11 | 3,16  | Yes         | SRR10418381 | Deboutte et al. 2020 | NextSeq | 150 | 7419086  | 28297   | 0 |
| BP23    | <i>Apis mellifera</i>    | <i>n.d.</i>   | 2012 | Flanders    | Belgium | 51,21 | 4,76  | Yes         | SRR10418380 | Deboutte et al. 2020 | NextSeq | 150 | 8536746  | 11146   | 0 |
| BP24    | <i>Apis mellifera</i>    | <i>n.d.</i>   | 2012 | Flanders    | Belgium | 51,21 | 4,76  | Yes         | SRR10418379 | Deboutte et al. 2020 | NextSeq | 150 | 9292866  | 168166  | 0 |
| BP25    | <i>Apis mellifera</i>    | <i>n.d.</i>   | 2012 | Flanders    | Belgium | 50,89 | 3,46  | Yes         | SRR10418378 | Deboutte et al. 2020 | NextSeq | 150 | 5853776  | 1379838 | 0 |
| BP26    | <i>Apis mellifera</i>    | <i>n.d.</i>   | 2012 | Flanders    | Belgium | 50,89 | 3,46  | Yes         | SRR10418377 | Deboutte et al. 2020 | NextSeq | 150 | 5266818  | 1023184 | 0 |
| BP27    | <i>Apis mellifera</i>    | <i>n.d.</i>   | 2012 | Flanders    | Belgium | 51,03 | 5,65  | Yes         | SRR10418376 | Deboutte et al. 2020 | NextSeq | 150 | 5462848  | 737278  | 0 |
| BP28    | <i>Apis mellifera</i>    | <i>n.d.</i>   | 2012 | Flanders    | Belgium | 51,03 | 5,65  | Yes         | SRR10418375 | Deboutte et al. 2020 | NextSeq | 150 | 5680036  | 414005  | 0 |
| BP29    | <i>Apis mellifera</i>    | <i>n.d.</i>   | 2012 | Flanders    | Belgium | 50,94 | 4,74  | Yes         | SRR10418374 | Deboutte et al. 2020 | NextSeq | 150 | 4909534  | 2679    | 0 |
| BP30    | <i>Apis mellifera</i>    | <i>n.d.</i>   | 2012 | Flanders    | Belgium | 50,97 | 4,33  | Yes         | SRR10418373 | Deboutte et al. 2020 | NextSeq | 150 | 6501168  | 7000    | 0 |
| BP31    | <i>Apis mellifera</i>    | <i>n.d.</i>   | 2012 | Flanders    | Belgium | 51,20 | 5,03  | Yes         | SRR10418371 | Deboutte et al. 2020 | NextSeq | 150 | 5704348  | 36474   | 0 |
| BP32    | <i>Apis mellifera</i>    | <i>n.d.</i>   | 2012 | Flanders    | Belgium | 51,18 | 3,09  | Yes         | SRR10418370 | Deboutte et al. 2020 | NextSeq | 150 | 3939058  | 196001  | 0 |
| BP33    | <i>Apis mellifera</i>    | <i>n.d.</i>   | 2012 | Flanders    | Belgium | 51,18 | 3,09  | Yes         | SRR10418369 | Deboutte et al. 2020 | NextSeq | 150 | 4827440  | 107     | 0 |
| BP34    | <i>Apis mellifera</i>    | <i>n.d.</i>   | 2012 | Flanders    | Belgium | 50,84 | 4,20  | Yes         | SRR10418368 | Deboutte et al. 2020 | NextSeq | 150 | 5159966  | 1110538 | 0 |
| BP35    | <i>Apis mellifera</i>    | <i>n.d.</i>   | 2012 | Flanders    | Belgium | 51,02 | 5,28  | Yes         | SRR10418367 | Deboutte et al. 2020 | NextSeq | 150 | 4052182  | 8       | 0 |
| BP36    | <i>Apis mellifera</i>    | <i>n.d.</i>   | 2012 | Flanders    | Belgium | 51,02 | 5,28  | Yes         | SRR10418366 | Deboutte et al. 2020 | NextSeq | 150 | 6386304  | 762564  | 0 |

|      |                       |      |      |          |         |       |      |     |             |                      |         |     |          |         |   |
|------|-----------------------|------|------|----------|---------|-------|------|-----|-------------|----------------------|---------|-----|----------|---------|---|
| BP37 | <i>Apis mellifera</i> | n.d. | 2012 | Flanders | Belgium | 50,77 | 4,06 | Yes | SRR10418365 | Deboutte et al. 2020 | NextSeq | 150 | 6253256  | 1067713 | 0 |
| BP38 | <i>Apis mellifera</i> | n.d. | 2012 | Flanders | Belgium | 50,88 | 3,72 | Yes | SRR10418364 | Deboutte et al. 2020 | NextSeq | 150 | 4937838  | 748084  | 0 |
| BP39 | <i>Apis mellifera</i> | n.d. | 2012 | Flanders | Belgium | 51,23 | 5,31 | Yes | SRR10418363 | Deboutte et al. 2020 | NextSeq | 150 | 3207142  | 432130  | 0 |
| BP40 | <i>Apis mellifera</i> | n.d. | 2012 | Flanders | Belgium | 51,01 | 3,89 | Yes | SRR10418362 | Deboutte et al. 2020 | NextSeq | 150 | 7279450  | 1076856 | 0 |
| BP41 | <i>Apis mellifera</i> | n.d. | 2012 | Flanders | Belgium | 51,10 | 3,99 | Yes | SRR10418360 | Deboutte et al. 2020 | NextSeq | 150 | 6641140  | 1430252 | 0 |
| BP42 | <i>Apis mellifera</i> | n.d. | 2012 | Flanders | Belgium | 51,03 | 4,10 | Yes | SRR10418359 | Deboutte et al. 2020 | NextSeq | 150 | 6443968  | 1465172 | 0 |
| BP43 | <i>Apis mellifera</i> | n.d. | 2012 | Flanders | Belgium | 51,01 | 4,30 | Yes | SRR10418358 | Deboutte et al. 2020 | NextSeq | 150 | 3969986  | 484     | 0 |
| BP44 | <i>Apis mellifera</i> | n.d. | 2012 | Flanders | Belgium | 51,07 | 3,87 | Yes | SRR10418357 | Deboutte et al. 2020 | NextSeq | 150 | 5337436  | 957360  | 0 |
| BP45 | <i>Apis mellifera</i> | n.d. | 2012 | Flanders | Belgium | 51,18 | 4,13 | Yes | SRR10418356 | Deboutte et al. 2020 | NextSeq | 150 | 3420788  | 13336   | 0 |
| BP46 | <i>Apis mellifera</i> | n.d. | 2012 | Flanders | Belgium | 50,90 | 5,10 | Yes | SRR10418355 | Deboutte et al. 2020 | NextSeq | 150 | 5715844  | 1669683 | 0 |
| BP47 | <i>Apis mellifera</i> | n.d. | 2012 | Flanders | Belgium | 51,08 | 5,24 | Yes | SRR10418354 | Deboutte et al. 2020 | NextSeq | 150 | 4472114  | 869848  | 0 |
| BP48 | <i>Apis mellifera</i> | n.d. | 2012 | Flanders | Belgium | 51,15 | 4,65 | Yes | SRR10418353 | Deboutte et al. 2020 | NextSeq | 150 | 5152982  | 25653   | 0 |
| BP49 | <i>Apis mellifera</i> | n.d. | 2012 | Flanders | Belgium | 50,94 | 4,36 | Yes | SRR10418352 | Deboutte et al. 2020 | NextSeq | 150 | 6236962  | 1009708 | 0 |
| BP50 | <i>Apis mellifera</i> | n.d. | 2012 | Flanders | Belgium | 51,09 | 3,90 | Yes | SRR10418351 | Deboutte et al. 2020 | NextSeq | 150 | 3668542  | 52      | 0 |
| BP51 | <i>Apis mellifera</i> | n.d. | 2013 | Flanders | Belgium | 51,03 | 3,85 | Yes | SRR10418349 | Deboutte et al. 2020 | NextSeq | 150 | 9606954  | 1293464 | 0 |
| BP52 | <i>Apis mellifera</i> | n.d. | 2013 | Flanders | Belgium | 51,03 | 3,85 | Yes | SRR10418348 | Deboutte et al. 2020 | NextSeq | 150 | 7817124  | 23065   | 0 |
| BP53 | <i>Apis mellifera</i> | n.d. | 2013 | Flanders | Belgium | 51,09 | 4,24 | Yes | SRR10418347 | Deboutte et al. 2020 | NextSeq | 150 | 11204696 | 2134118 | 0 |
| BP54 | <i>Apis mellifera</i> | n.d. | 2013 | Flanders | Belgium | 51,09 | 4,24 | Yes | SRR10418346 | Deboutte et al. 2020 | NextSeq | 150 | 10323126 | 1600214 | 0 |
| BP55 | <i>Apis mellifera</i> | n.d. | 2013 | Flanders | Belgium | 51,16 | 4,67 | Yes | SRR10418345 | Deboutte et al. 2020 | NextSeq | 150 | 8567892  | 1135344 | 0 |
| BP56 | <i>Apis mellifera</i> | n.d. | 2013 | Flanders | Belgium | 51,16 | 4,67 | Yes | SRR10418344 | Deboutte et al. 2020 | NextSeq | 150 | 9884910  | 164     | 0 |
| BP57 | <i>Apis mellifera</i> | n.d. | 2013 | Flanders | Belgium | 50,84 | 2,72 | Yes | SRR10418343 | Deboutte et al. 2020 | NextSeq | 150 | 5580088  | 1977695 | 0 |
| BP58 | <i>Apis mellifera</i> | n.d. | 2013 | Flanders | Belgium | 50,85 | 2,89 | Yes | SRR10418342 | Deboutte et al. 2020 | NextSeq | 150 | 11081704 | 19      | 0 |
| BP59 | <i>Apis mellifera</i> | n.d. | 2013 | Flanders | Belgium | 51,16 | 4,67 | Yes | SRR10418341 | Deboutte et al. 2020 | NextSeq | 150 | 10011676 | 1530928 | 0 |
| BP60 | <i>Apis mellifera</i> | n.d. | 2013 | Flanders | Belgium | 51,07 | 5,09 | Yes | SRR10418340 | Deboutte et al. 2020 | NextSeq | 150 | 10776852 | 321     | 0 |
| BP61 | <i>Apis mellifera</i> | n.d. | 2013 | Flanders | Belgium | 51,09 | 4,24 | Yes | SRR10418338 | Deboutte et al. 2020 | NextSeq | 150 | 10587520 | 56896   | 0 |
| BP62 | <i>Apis mellifera</i> | n.d. | 2013 | Flanders | Belgium | 51,33 | 4,60 | Yes | SRR10418337 | Deboutte et al. 2020 | NextSeq | 150 | 10204144 | 9370    | 0 |
| BP63 | <i>Apis mellifera</i> | n.d. | 2013 | Flanders | Belgium | 50,97 | 4,98 | Yes | SRR10418336 | Deboutte et al. 2020 | NextSeq | 150 | 14462860 | 2396453 | 0 |
| BP64 | <i>Apis mellifera</i> | n.d. | 2013 | Flanders | Belgium | 51,01 | 5,48 | Yes | SRR10418335 | Deboutte et al. 2020 | NextSeq | 150 | 11343930 | 71      | 0 |
| BP65 | <i>Apis mellifera</i> | n.d. | 2013 | Flanders | Belgium | 51,01 | 5,48 | Yes | SRR10418334 | Deboutte et al. 2020 | NextSeq | 150 | 13681346 | 483901  | 0 |
| BP66 | <i>Apis mellifera</i> | n.d. | 2013 | Flanders | Belgium | 50,94 | 4,57 | Yes | SRR10418333 | Deboutte et al. 2020 | NextSeq | 150 | 10806772 | 18276   | 0 |
| BP67 | <i>Apis mellifera</i> | n.d. | 2013 | Flanders | Belgium | 50,94 | 4,57 | Yes | SRR10418332 | Deboutte et al. 2020 | NextSeq | 150 | 13994478 | 1823187 | 0 |
| BP68 | <i>Apis mellifera</i> | n.d. | 2013 | Flanders | Belgium | 50,95 | 3,32 | Yes | SRR10418331 | Deboutte et al. 2020 | NextSeq | 150 | 12141518 | 1761289 | 0 |
| BP69 | <i>Apis mellifera</i> | n.d. | 2013 | Flanders | Belgium | 51,22 | 4,89 | Yes | SRR10418330 | Deboutte et al. 2020 | NextSeq | 150 | 8022530  | 13894   | 0 |
| BP70 | <i>Apis mellifera</i> | n.d. | 2013 | Flanders | Belgium | 51,22 | 4,89 | Yes | SRR10418329 | Deboutte et al. 2020 | NextSeq | 150 | 10609718 | 193     | 0 |
| BP71 | <i>Apis mellifera</i> | n.d. | 2013 | Flanders | Belgium | 50,95 | 3,32 | Yes | SRR10418327 | Deboutte et al. 2020 | NextSeq | 150 | 10995850 | 1796000 | 0 |
| BP72 | <i>Apis mellifera</i> | n.d. | 2013 | Flanders | Belgium | 51,00 | 3,88 | Yes | SRR10418326 | Deboutte et al. 2020 | NextSeq | 150 | 11861826 | 512550  | 0 |
| BP73 | <i>Apis mellifera</i> | n.d. | 2013 | Flanders | Belgium | 51,00 | 3,88 | Yes | SRR10418325 | Deboutte et al. 2020 | NextSeq | 150 | 16180544 | 1041369 | 0 |
| BP74 | <i>Apis mellifera</i> | n.d. | 2013 | Flanders | Belgium | 51,17 | 4,57 | Yes | SRR10418324 | Deboutte et al. 2020 | NextSeq | 150 | 10730000 | 5761811 | 0 |
| BP75 | <i>Apis mellifera</i> | n.d. | 2013 | Flanders | Belgium | 51,22 | 4,40 | Yes | SRR10418323 | Deboutte et al. 2020 | NextSeq | 150 | 9564610  | 461     | 0 |
| BP76 | <i>Apis mellifera</i> | n.d. | 2013 | Flanders | Belgium | 50,88 | 2,86 | Yes | SRR10418322 | Deboutte et al. 2020 | NextSeq | 150 | 10819630 | 788805  | 0 |
| BP77 | <i>Apis mellifera</i> | n.d. | 2013 | Flanders | Belgium | 50,91 | 2,99 | Yes | SRR10418321 | Deboutte et al. 2020 | NextSeq | 150 | 9267018  | 1343548 | 0 |
| BP78 | <i>Apis mellifera</i> | n.d. | 2013 | Flanders | Belgium | 51,04 | 5,52 | Yes | SRR10418320 | Deboutte et al. 2020 | NextSeq | 150 | 11254322 | 19      | 0 |
| BP79 | <i>Apis mellifera</i> | n.d. | 2013 | Flanders | Belgium | 51,04 | 5,52 | Yes | SRR10418319 | Deboutte et al. 2020 | NextSeq | 150 | 11840988 | 468101  | 0 |
| BP80 | <i>Apis mellifera</i> | n.d. | 2013 | Flanders | Belgium | 51,14 | 4,04 | Yes | SRR10418318 | Deboutte et al. 2020 | NextSeq | 150 | 9611514  | 5       | 0 |
| BP81 | <i>Apis mellifera</i> | n.d. | 2013 | Flanders | Belgium | 51,14 | 4,04 | Yes | SRR10418316 | Deboutte et al. 2020 | NextSeq | 150 | 11399586 | 1730333 | 0 |
| BP82 | <i>Apis mellifera</i> | n.d. | 2013 | Flanders | Belgium | 50,98 | 4,64 | Yes | SRR10418315 | Deboutte et al. 2020 | NextSeq | 150 | 13586622 | 2148691 | 0 |

|         |                       |                 |      |                |          |       |       |     |             |                        |         |     |          |          |   |
|---------|-----------------------|-----------------|------|----------------|----------|-------|-------|-----|-------------|------------------------|---------|-----|----------|----------|---|
| BP83    | <i>Apis mellifera</i> | <i>n.d.</i>     | 2013 | Flanders       | Belgium  | 50,97 | 4,75  | Yes | SRR10418314 | Deboutte et al. 2020   | NextSeq | 150 | 13162578 | 107004   | 0 |
| BP84    | <i>Apis mellifera</i> | <i>n.d.</i>     | 2013 | Flanders       | Belgium  | 51,07 | 3,02  | Yes | SRR10418313 | Deboutte et al. 2020   | NextSeq | 150 | 15432800 | 1812162  | 0 |
| BP85    | <i>Apis mellifera</i> | <i>n.d.</i>     | 2013 | Flanders       | Belgium  | 51,07 | 3,02  | Yes | SRR10418312 | Deboutte et al. 2020   | NextSeq | 150 | 8487678  | 271864   | 0 |
| BP86    | <i>Apis mellifera</i> | <i>n.d.</i>     | 2013 | Flanders       | Belgium  | 50,92 | 4,89  | Yes | SRR10418311 | Deboutte et al. 2020   | NextSeq | 150 | 12641522 | 1489160  | 0 |
| BP87    | <i>Apis mellifera</i> | <i>n.d.</i>     | 2013 | Flanders       | Belgium  | 50,92 | 4,95  | Yes | SRR10418310 | Deboutte et al. 2020   | NextSeq | 150 | 10219812 | 74394    | 0 |
| BP88    | <i>Apis mellifera</i> | <i>n.d.</i>     | 2013 | Flanders       | Belgium  | 51,00 | 4,86  | Yes | SRR10418309 | Deboutte et al. 2020   | NextSeq | 150 | 11120936 | 1489372  | 0 |
| BP89    | <i>Apis mellifera</i> | <i>n.d.</i>     | 2013 | Flanders       | Belgium  | 51,00 | 4,86  | Yes | SRR10418308 | Deboutte et al. 2020   | NextSeq | 150 | 10048238 | 1369780  | 0 |
| BP90    | <i>Apis mellifera</i> | <i>n.d.</i>     | 2013 | Flanders       | Belgium  | 51,11 | 4,82  | Yes | SRR10418307 | Deboutte et al. 2020   | NextSeq | 150 | 11915180 | 80961    | 0 |
| BP91    | <i>Apis mellifera</i> | <i>n.d.</i>     | 2013 | Flanders       | Belgium  | 51,11 | 4,82  | Yes | SRR10418305 | Deboutte et al. 2020   | NextSeq | 150 | 10934776 | 2548337  | 0 |
| BP92    | <i>Apis mellifera</i> | <i>n.d.</i>     | 2013 | Flanders       | Belgium  | 50,95 | 4,95  | Yes | SRR10418304 | Deboutte et al. 2020   | NextSeq | 150 | 14708578 | 664      | 0 |
| BP93    | <i>Apis mellifera</i> | <i>n.d.</i>     | 2013 | Flanders       | Belgium  | 50,85 | 3,83  | Yes | SRR10418303 | Deboutte et al. 2020   | NextSeq | 150 | 18333180 | 2663109  | 0 |
| BP94    | <i>Apis mellifera</i> | <i>n.d.</i>     | 2013 | Flanders       | Belgium  | 50,85 | 3,83  | Yes | SRR10418302 | Deboutte et al. 2020   | NextSeq | 150 | 20324886 | 15102228 | 0 |
| BP95    | <i>Apis mellifera</i> | <i>n.d.</i>     | 2013 | Flanders       | Belgium  | 50,85 | 3,27  | Yes | SRR10418301 | Deboutte et al. 2020   | NextSeq | 150 | 18832406 | 3246174  | 0 |
| BP96    | <i>Apis mellifera</i> | <i>n.d.</i>     | 2013 | Flanders       | Belgium  | 50,88 | 5,25  | Yes | SRR10418300 | Deboutte et al. 2020   | NextSeq | 150 | 20305402 | 2991931  | 0 |
| BP97    | <i>Apis mellifera</i> | <i>n.d.</i>     | 2013 | Flanders       | Belgium  | 50,91 | 5,03  | Yes | SRR10418299 | Deboutte et al. 2020   | NextSeq | 150 | 20892538 | 73721    | 0 |
| BP98    | <i>Apis mellifera</i> | <i>n.d.</i>     | 2013 | Flanders       | Belgium  | 51,00 | 3,46  | Yes | SRR10418298 | Deboutte et al. 2020   | NextSeq | 150 | 21245764 | 3192277  | 0 |
| BP99    | <i>Apis mellifera</i> | <i>n.d.</i>     | 2013 | Flanders       | Belgium  | 50,95 | 3,59  | Yes | SRR10418297 | Deboutte et al. 2020   | NextSeq | 150 | 10742598 | 15394    | 0 |
| BP100   | <i>Apis mellifera</i> | <i>n.d.</i>     | 2013 | Flanders       | Belgium  | 50,84 | 4,02  | Yes | SRR10418296 | Deboutte et al. 2020   | NextSeq | 150 | 17187642 | 25       | 0 |
| BP101   | <i>Apis mellifera</i> | <i>n.d.</i>     | 2013 | Flanders       | Belgium  | 50,83 | 5,20  | Yes | SRR10418394 | Deboutte et al. 2020   | NextSeq | 150 | 15290220 | 23358    | 0 |
| BP102   | <i>Apis mellifera</i> | <i>n.d.</i>     | 2013 | Flanders       | Belgium  | 50,83 | 5,20  | Yes | SRR10418393 | Deboutte et al. 2020   | NextSeq | 150 | 20733422 | 3737104  | 0 |
| Ethi_1  | <i>Apis mellifera</i> | <i>Simensis</i> | 2017 | Ganta Afeshum  | Ethiopia | 14,23 | 39,50 | Yes | PRJNA559070 | Gebremedhm et al. 2020 | NextSeq | 150 | 7581498  | 155074   | 0 |
| Ethi_2  | <i>Apis mellifera</i> | <i>Simensis</i> | 2017 | Kafta Humera   | Ethiopia | 13,99 | 36,85 | Yes | PRJNA559070 | Gebremedhm et al. 2020 | NextSeq | 150 | 6540078  | 138      | 0 |
| Ethi_3  | <i>Apis mellifera</i> | <i>Simensis</i> | 2017 | Degua Tembien  | Ethiopia | 13,67 | 39,24 | Yes | PRJNA559070 | Gebremedhm et al. 2020 | NextSeq | 150 | 7786998  | 58       | 0 |
| Ethi_4  | <i>Apis mellifera</i> | <i>Simensis</i> | 2017 | Kilete Awlealo | Ethiopia | 13,80 | 39,61 | Yes | PRJNA559070 | Gebremedhm et al. 2020 | NextSeq | 150 | 8414120  | 0        | 0 |
| Ethi_5  | <i>Apis mellifera</i> | <i>Simensis</i> | 2017 | Kilete Awlealo | Ethiopia | 13,75 | 39,55 | Yes | PRJNA559070 | Gebremedhm et al. 2020 | NextSeq | 150 | 7328122  | 6872     | 0 |
| Ethi_6  | <i>Apis mellifera</i> | <i>Simensis</i> | 2017 | Mekelle        | Ethiopia | 13,52 | 39,51 | Yes | PRJNA559070 | Gebremedhm et al. 2020 | NextSeq | 150 | 7754530  | 476270   | 0 |
| Ethi_7  | <i>Apis mellifera</i> | <i>Simensis</i> | 2017 | Hawzen         | Ethiopia | 13,99 | 39,42 | Yes | PRJNA559070 | Gebremedhm et al. 2020 | NextSeq | 150 | 6853040  | 327      | 0 |
| Ethi_8  | <i>Apis mellifera</i> | <i>Simensis</i> | 2017 | Atsy Wonberta  | Ethiopia | 13,75 | 39,71 | Yes | PRJNA559070 | Gebremedhm et al. 2020 | NextSeq | 150 | 7397012  | 905699   | 0 |
| Ethi_9  | <i>Apis mellifera</i> | <i>Simensis</i> | 2017 | Atsy Wonberta  | Ethiopia | 13,82 | 39,72 | Yes | PRJNA559070 | Gebremedhm et al. 2020 | NextSeq | 150 | 6907528  | 802649   | 0 |
| Ethi_10 | <i>Apis mellifera</i> | <i>Simensis</i> | 2017 | Gulo Mkada     | Ethiopia | 13,42 | 39,37 | Yes | PRJNA559070 | Gebremedhm et al. 2020 | NextSeq | 150 | 8578176  | 152      | 0 |

### Supplementary Table S3: SRA libraries and samples screened for DWV-D

Details of the RNA sequencing libraries screened for the presence of DWV-D, including the year, geographic location and host organism the RNA was isolated from, the presence or not of *V. destructor* in the region, the sequencing technology used (NGS) and average read length, accession number (if available) of the Small Read Archive (SRA) where the original raw data is stored, the original reference (if available), the total number of raw reads screened, the number of these matching DWV in general, and the number matching uniquely to only DWV-D.
